# Supplementary material for: Cyclic-AMP-dependent protein kinase (PKA) activity assay based on FRET between cationic conjugated polymer and chromophore-labeled peptide
Source: Royal Society of Chemistry journal article supplement (doi:10.1039/c4an00814f), 2014-06-20
Supplement: c4an00814f1.pdf [file c4an00814f1.pdf]

## Supporting Information

### **Cyclic-AMP-Dependent Protein Kinase (PKA) Activity Assay Based on the FRET between Cationic Conjugated Polymer and Chromophore-Labeled Peptide**

Shiyun Tang, Yufang Hu, Qinpeng Shen, Heting Fang, Wang Li\*, Zhou Nie, Shouzhao Yao

*State Key Laboratory of Chemo/Biosensing & Chemometrics, College of Chemistry & Chemical Engineering, Hunan University, Changsha 410082, China*

*\*Corresponding author.*

*Tel.: +86-731-88821626, fax: +86 -731-88821848*

*E-mail address: wli@hnu.edu.cn*

## Supplementary Materials

### Experimental

The water soluble CCP, poly (9, 9-bis (6'-*N, N, N*-trimethylammonium) hexyl) fluorenylene phenylene (PF) was synthesized according to the reported method.<sup>1</sup>

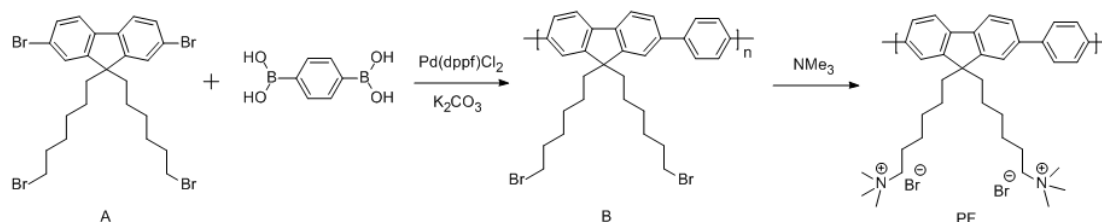

Scheme S1. Synthesis of PF.

#### Synthesis of compound B

2, 7-Dibromo-9, 9-bis (6'-bromohexyl) fluorene (325 mg, 0.5 mmol), 1, 4-phenyldiboronic acid (82.9 mg, 0.5 mmol), potassium carbonate (830mg, 6 mmol) and Pd (dppf) Cl<sub>2</sub> (7 mg) were placed in a 50 mL round bottom flask. A mixture of THF (6 mL) and water (3 mL) was added to the flask, the reaction vessel was degassed and filled with argon. The mixture was stirred at 85 °C for 24 h. Cool down the reaction to room temperature and, then precipitated into methanol. The polymer was filtered and washed with methanol and acetone, and then dried under vacuum for 24 h to afford compound B (197.5g, 70%), as an off-white solid. <sup>1</sup>H NMR (400 MHz, CDCl<sub>3</sub>): δ7.84 (m, 5H), 7.70-7.60 (m, 4H), 7.5 (m, 1H), 3.31 (t, 4H), 2.11 (m, 4H), 1.70 (m, 4H), 1.26-1.15(m, 8H), 0.80 (m, 4H).

#### Synthesis of compound PF

The neutral compound B (60 mg) and THF (10 mL) was placed in in a 25 ml round bottle flask, then condensed trimethylamine (2 mL) was added dropwise to the solution at -78 °C. Then the mixture was allowed to warm up to room temperature and react at

room temperature for 24 h. The precipitate was re-dissolved by the addition of water (10 mL). After the mixture was cooled down to  $-78\text{ }^{\circ}\text{C}$ , extra trimethylamine (2 mL) was added and the mixture was stirred for 24 h at room temperature. After removing most of the solvent, acetone was added to precipitate compound PF (54 mg, 67%), as an off-white powder.  $^1\text{H}$  NMR (400 MHz,  $\text{CD}_3\text{OD}$ ):  $\delta$  8.07-7.51 (m, 10H), 3.31-3.22 (t, 4H), 3.04 (s, 18H), 2.25 (br, 4H), 1.57 (br, 4H), 1.18 (br, 8H), 0.77 (br, 4H).

## Results and discussion

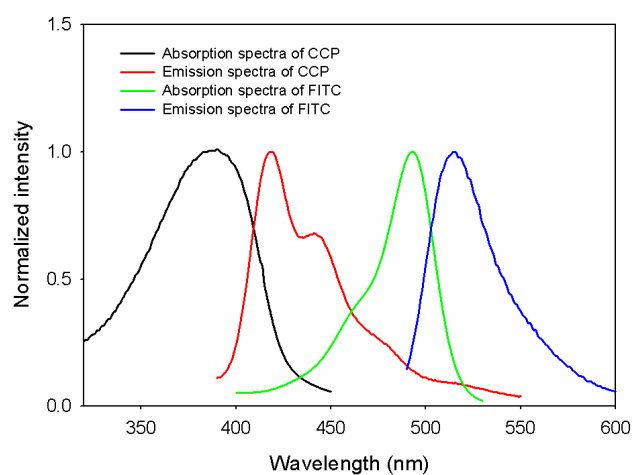

Supplementary Figure S1. The spectral properties of CCP and free FITC.

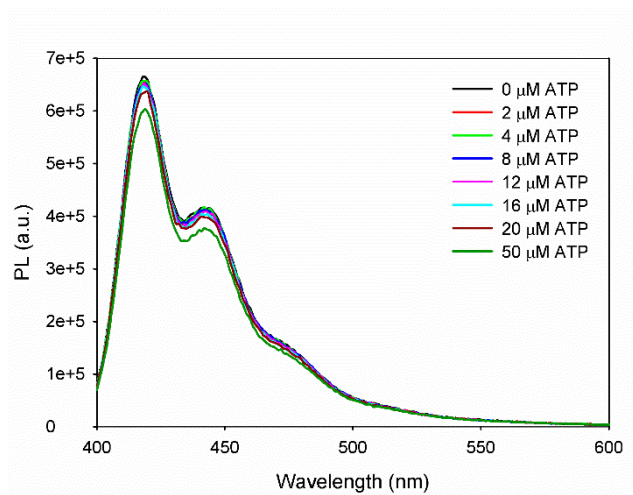

Supplementary Figure S2. Effects of concentration of ATP on the fluorescence intensity of CCP. Conditions:  $2.95 \times 10^{-6}$  M (in RUs) CCP.

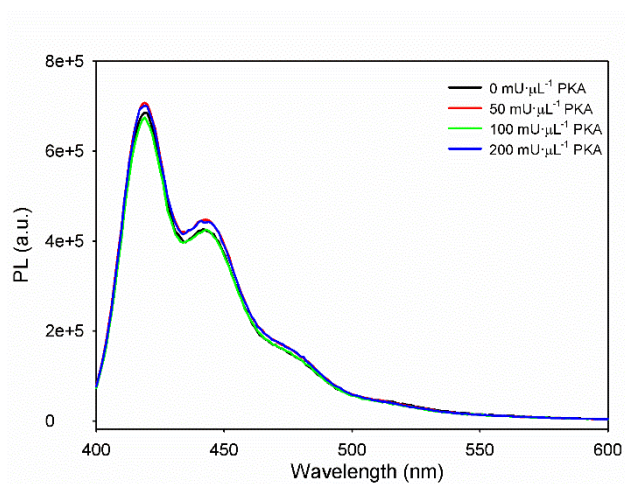

Supplementary Figure S3. Effects of concentration of PKA on the fluorescence intensity of CCP. Condition:  $2.95 \times 10^{-6}$  M (in RUs) CCP.

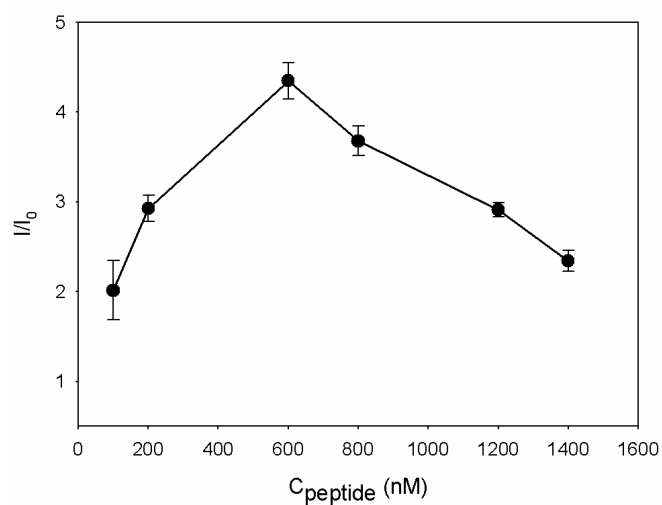

Supplementary Figure S4. Optimization of the F-S-peptide concentration. Conditions:  $2.95 \times 10^{-6}$  M (in RUs) CCP,  $4 \mu\text{M}$  ATP,  $50 \text{ mU} \cdot \mu\text{L}^{-1}$  PKA, 100, 200, 600, 800, 1200, 1400 nM F-S-peptide.

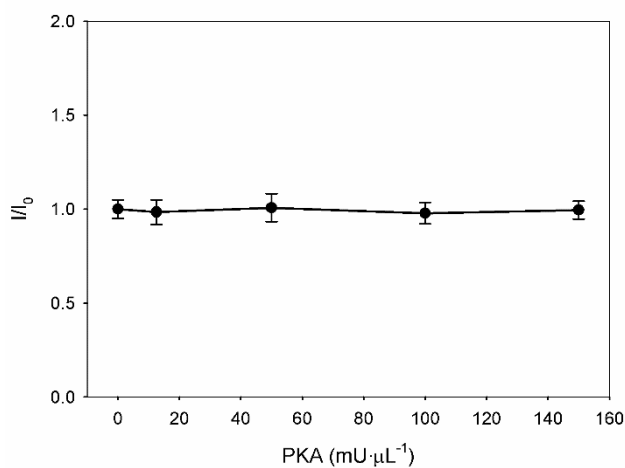

Supplementary Figure S5. Effect of concentration of PKA on the FRET between CCP and F-S-peptide. Conditions:  $2.95 \times 10^{-6}$  M (in RUs) CCP;  $4 \mu\text{M}$  ATP; 0, 12.5, 50, 100, 150  $\text{mU} \cdot \mu\text{L}^{-1}$  PKA; 600 nM F-S-peptide.

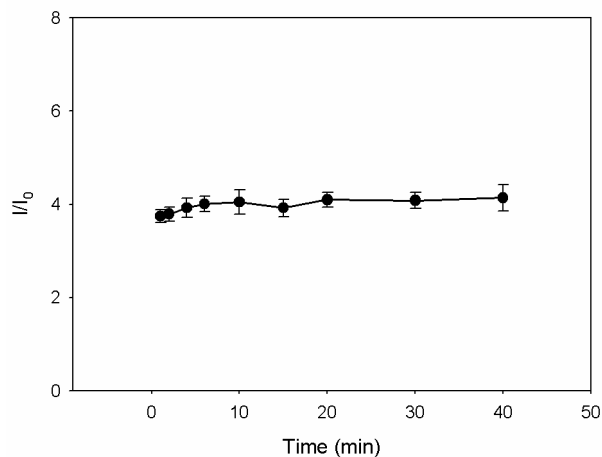

Supplementary Figure S6. Optimization of the incubation time between F-P-peptide and CCP. Conditions:  $2.95 \times 10^{-6}$  M (in RUs) CCP,  $4 \mu\text{M}$  ATP,  $50 \text{ mU} \cdot \mu\text{L}^{-1}$  PKA,  $600 \text{ nM}$  F-S-peptide. Start timing after mix F-P-peptide and CCP.

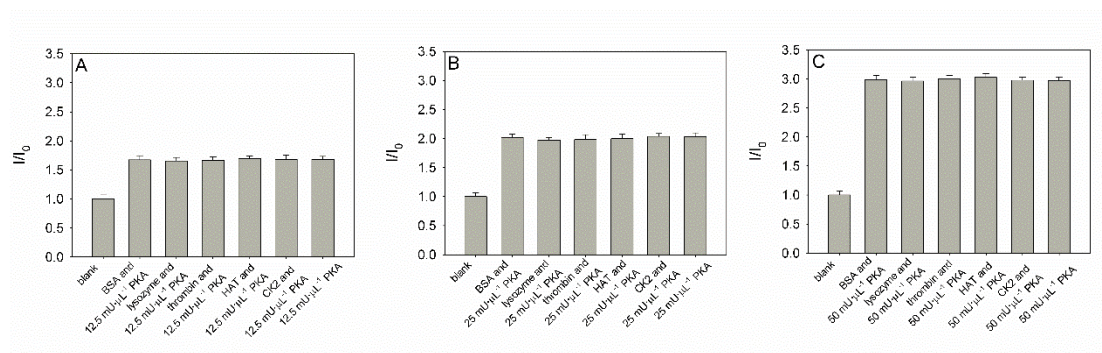

Supplementary Figure S7. The effect of other proteins on PKA. Conditions:  $2.95 \times 10^{-6}$  M (in repeat units (RUs)) CCP,  $4 \mu\text{M}$  ATP, the concentration of each kind of protein was  $0.83 \text{ nM}$ ,  $50 \text{ mU} \cdot \mu\text{L}^{-1}$  PKA is about  $0.26 \text{ nM}$ .

#### Reference

1. B. Liu, S. Wang, G. C. Bazan and A. Mikhailovsky, *J. Am. Chem. Soc.*, 2003, 125, 13306-13307.
